# Supplementary material for: Longer-term Lipid-lowering Drug Use and Risk of Incident and Fatal Prostate Cancer in Black and White Men in the ARIC Study
Source: Oxford University Press journal article supplement (doi:10.1158/1940-6207.capr-17-0396), 2018-10-16
Supplement: 19406207capr170396-sup-193359_2_supp_5070554_pfz7gp.docx [file 19406207capr170396-sup-193359_2_supp_5070554_pfz7gp.docx]

| **Supplemental Table 1: Association between lipid-lowering medication use and incident prostate cancer by frequency of routine physical examinations, and among participants who had health insurance or had private health insurance and/or Medicare, men in ARIC (1990-2012)** | | | | | | | | |
| --- | --- | --- | --- | --- | --- | --- | --- | --- |
|  | **Current lipid-lowering medication use** | **# Incident prostate cancer** | **Person-years** | **HR *** | **(95% CI)** |  | **HR †** | **(95% CI)** |
| **Routine Physical Examination** | | | | | | | | |
| At least once every 5 years | No | 313 | 38,635 | 1.0 | (Ref) |  | 1.0 | (Ref) |
| Yes | 194 | 21,659 | 1.06 | (0.87-1.30) |  | 1.07 | (0.87-1.31) |
| Less frequently | No | 200 | 28,316 | 1.0 | (Ref) |  | 1.0 | (Ref) |
| Yes | 93 | 11,873 | 0.90 | (0.68-1.18) |  | 0.95 | (0.72-1.26) |
|  |  | *P-interaction* | | 0.84 | |  | 0.76 | |
| **Had Health Insurance** ‡ | | | | | | | | |
|  | No | 409 | 51,692 | 1.0 | (Ref) |  | 1.0 | (Ref) |
| Yes | 231 | 27,488 | 0.91 | (0.76-1.09) |  | 0.92 | (0.77-1.11) |
| **Had Private Health Insurance and/or Medicare** ‡ | | | | | | | | |
|  | No | 402 | 51,485 | 1.0 | (Ref) |  | 1.0 | (Ref) |
| Yes | 226 | 27,321 | 0.92 | (0.77-1.10) |  | 0.93 | (0.78-1.12) |
|  |  | | |  | |  |  | |
| * Adjusted for age, and joint categories of race and field center.  † Adjusted for age, joint categories of race and field center, height, updated BMI, updated cigarette smoking status, updated diabetes status, updated aspirin use, and education level.  ‡ 91% had health insurance and 74% had private health insurance and/or Medicare. | | | | | | | | |

| **Supplemental Table 2: Association between lipid-lowering medication use and fatal prostate cancer stratified by routine physical examination, and among participants who had health insurance or had private health insurance and/or Medicare, men in ARIC (1990-2012)** | | | | | | | | |
| --- | --- | --- | --- | --- | --- | --- | --- | --- |
|  | **Current lipid-lowering medication use** | **# Prostate cancer deaths** | **Person- years** | **HR *** | **(95% CI)** |  | **HR †** | **(95% CI)** |
| **Routine Physical Examination** | | | | | | | | |
| At least once every 5 years | No | 26 | 42,858 | 1.0 | (Ref) |  | 1.0 | (Ref) |
| Yes | 26 | 26,508 | 0.83 | (0.45-1.52) |  | 0.85 | (0.46-1.57) |
| Less frequently | No | 27 | 31,149 | 1.0 | (Ref) |  | 1.0 | (Ref) |
| Yes | 11 | 14,026 | 0.46 | (0.22-0.98) |  | 0.48 | (0.22-1.03) |
|  |  | *P-interaction* | | 0.30 | |  | 0.34 | |
| **Had Health Insurance ‡** | | | | | | | | |
|  | No | 49 | 70,844 | 1.0 | (Ref) |  | 1.0 | (Ref) |
| Yes | 34 | 39,281 | 0.62 | (0.39-1.00) |  | 0.63 | (0.39-1.02) |
| **Had Private Health Insurance and/or Medicare ‡** | | | | | | | | |
|  | No | 32 | 56,892 | 1.0 | (Ref) |  | 1.0 | (Ref) |
| Yes | 28 | 33,205 | 0.64 | (0.37-1.09) |  | 0.62 | (0.35-1.07) |
|  |  | | |  | |  |  | |
| * Adjusted for age, and joint categories of race and field center.  † Adjusted for age, joint categories of race and field center, height, updated BMI, updated cigarette smoking status, updated diabetes status, updated aspirin use, and education level.  ‡ 91% had health insurance and 74% had private health insurance and/or Medicare. | | | | | | | | |
